# Supplementary material for: A thiazolothiazole based Cu2+selective colorimetric and fluorescent sensor via unique radical formation
Source: Royal Society of Chemistry journal article supplement (doi:10.1039/c2cc36626f), 2012-11-09
Supplement: c2cc36626f.pdf [file c2cc36626f.pdf]

Supporting Information for

## Thiazolothiazole Based Cu<sup>2+</sup> Selective Colorimetric and Fluorescent Sensor via Unique Radical Formation

Ji Young Jung,<sup>a,‡</sup> Minkyung Kang,<sup>b,‡</sup> Jihyun Chun,<sup>b</sup> Jungha Lee,<sup>b</sup> Jaemee Kim,<sup>b</sup> Jinheung Kim,<sup>b</sup> Youngmee Kim,<sup>b</sup> Sung-Jin Kim,<sup>b</sup> Chongmok Lee<sup>b,\*</sup> and Juyoung Yoon<sup>a,b,\*</sup>

<sup>a</sup>Department of Bioinspired Science (WCU), Ewha Womans University, Seoul 120-750, Korea

<sup>b</sup>Department of Chemistry and Nano Science, Ewha Womans University, Seoul 120-750, Korea

[jyoon@ewha.ac.kr](mailto:jyoon@ewha.ac.kr); [cmlee@ewha.ac.kr](mailto:cmlee@ewha.ac.kr)

‡ contributed equally to this work

|                            |         |
|----------------------------|---------|
| Experimental Section ..... | S2 page |
| Figure S1 .....            | S3 page |
| Figure S2 .....            | S3 page |
| Figure S3 .....            | S4 page |
| Figure S4 .....            | S5 page |
| Table S1 .....             | S6 page |
| Table S2 .....             | S7 page |

## Experimental

### 1. Synthesis

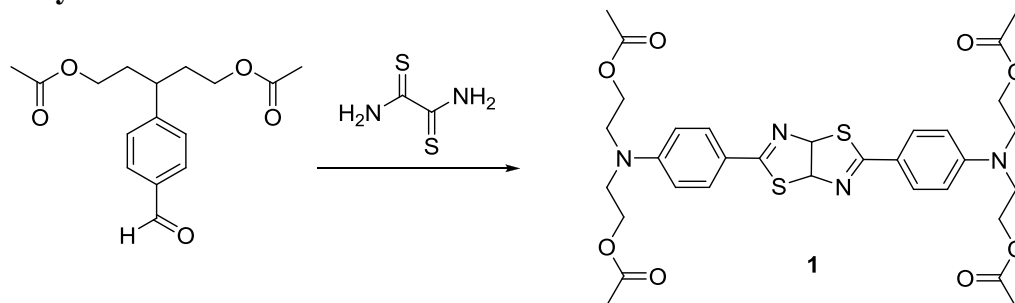

### Synthesis of **1**

A mixture of 4-(bis(2-(acethoxy)ethyl)amino)benzaldehyde (1.3 g, 4.43 mmol) and dithiooxamide (0.15 g, 1.25 mmol) in DMF (5 ml) was heated at 160°C. The reaction was refluxed under the N<sub>2</sub> for 60h, then the solvent was evaporated. The crude product was purified by column chromatography using hexane:ethyl acetate (9:1) as eluent to give compound **1** as yellow powder (0.54 g, 64 %). Mp 280 °C dec. <sup>1</sup>H NMR (CDCl<sub>3</sub>, 250 MHz) δ 7.78 (d, 4H, *J* = 11.3Hz), 6.74 (d, 4H, *J* = 11.3Hz) 4.21 (t, 8H, *J* = 7.1Hz), 3.63 (t, 8H, *J* = 7.08Hz), 2.00 (s, 12H); <sup>13</sup>C NMR (CDCl<sub>3</sub>, 250 MHz) δ 170.9, 168.5, 148.9, 141.1, 127.8, 123.1, 112.3, 61.2, 49.6, 20.9; HRMS (FAB) calcd for C<sub>32</sub>H<sub>36</sub>N<sub>4</sub>O<sub>8</sub>S<sub>2</sub> 668.1975; found 669.2953 (M + H)<sup>+</sup>.

### UV and fluorescent study

Stock solutions (10 mM) of the perchlorate salts of Al<sup>3+</sup>, Cr<sup>3+</sup>, Ag<sup>+</sup>, Fe<sup>2+</sup>, Fe<sup>3+</sup>, Ca<sup>2+</sup>, Cd<sup>2+</sup>, Co<sup>2+</sup>, Cu<sup>2+</sup>, Hg<sup>2+</sup>, K<sup>+</sup>, Li<sup>+</sup>, Cs<sup>+</sup>, Mg<sup>2+</sup>, Mn<sup>2+</sup>, Na<sup>+</sup>, Ni<sup>2+</sup>, Pb<sup>2+</sup>, Zn<sup>2+</sup>, Cu<sup>+</sup> ions in CH<sub>3</sub>CN were prepared. Stock solutions of **1** (0.1 mM) was also prepared in CH<sub>3</sub>CN, respectively. Test solutions were prepared by placing 300 μL of the probe stock solution into a test tube, adding an appropriate aliquot of each metal stock, and diluting the solution to 3mL with CH<sub>3</sub>CN and DW. The absorption and fluorescence properties of **1** was tested in CH<sub>3</sub>CN:DW (95:5, v/v).

### X-ray Crystallography

The X-ray diffraction data for two compounds were collected on a Bruker SMART APEX diffractometer equipped with a monochromator in the Mo Kα (k = 0.71073 Å) incident beam. Each crystal was mounted on a glass fiber. The CCD data (CCDC number: 900345) were integrated and scaled using the Bruker-S SAINT software package, and the structure was solved and refined using SHELXTL V6.12. All hydrogen atoms were placed in the calculated positions.

The crystallographic data were listed in Table S1. The bond lengths and angles were listed in Table S2.

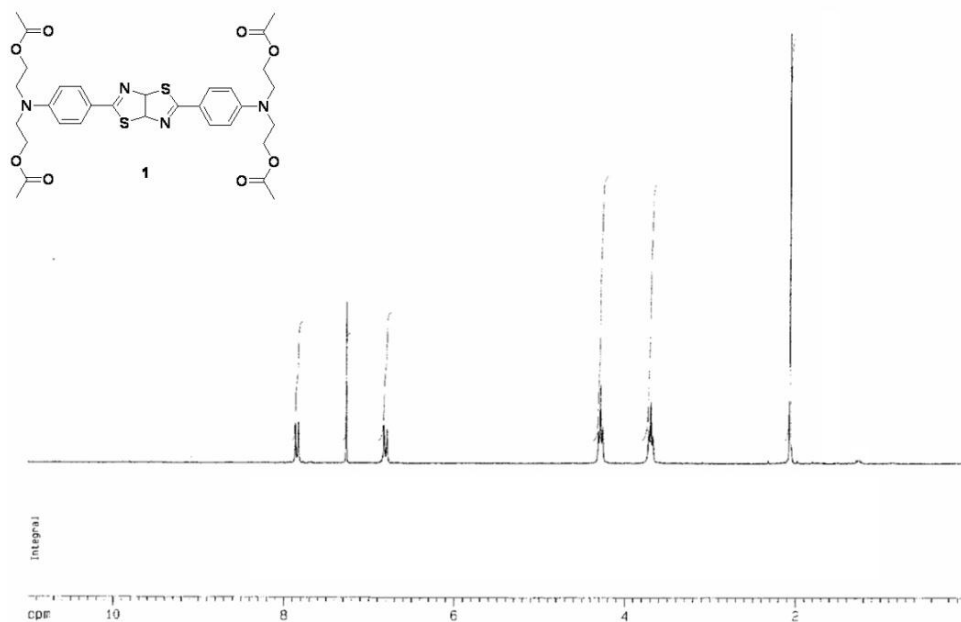

**Fig. S1.**  $^1\text{H}$  NMR (250 MHz) of compound **4** in  $\text{CDCl}_3$

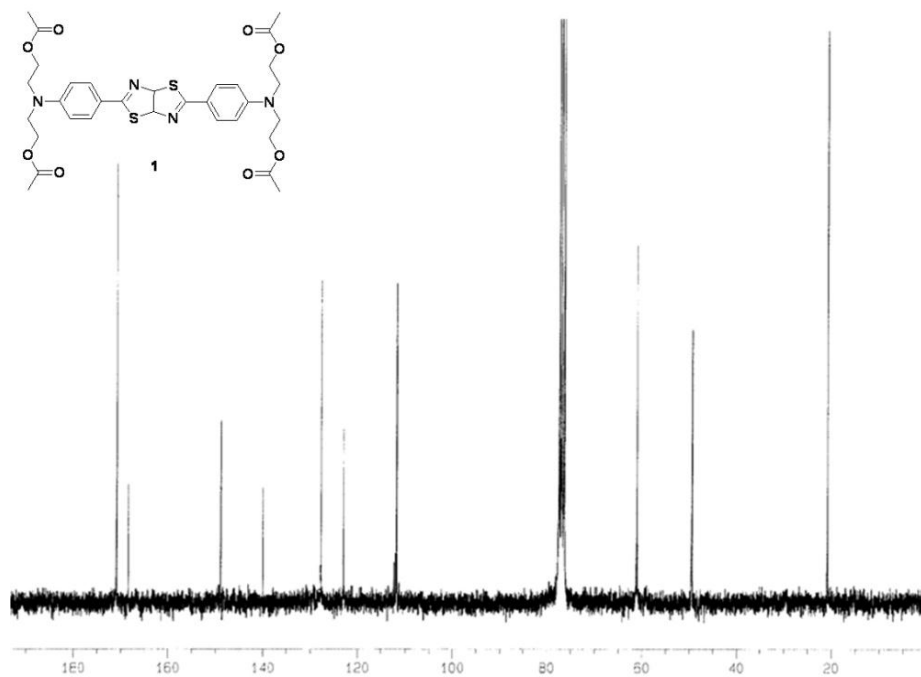

**Fig. S2.**  $^{13}\text{C}$  NMR (125 MHz) spectrum of compound **4** in  $\text{CDCl}_3$ .

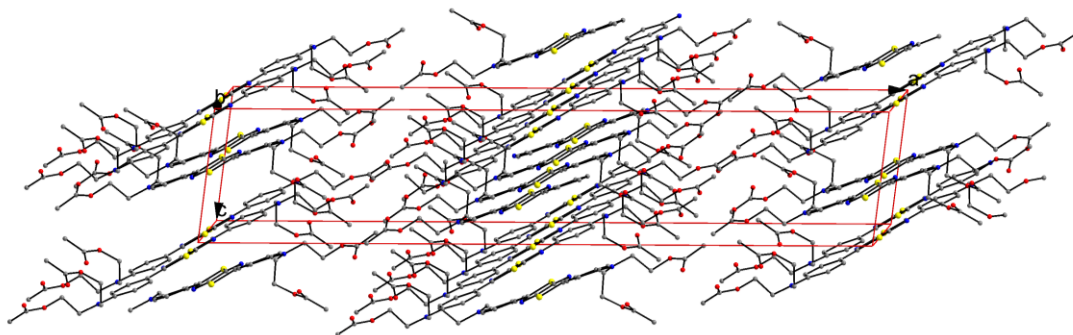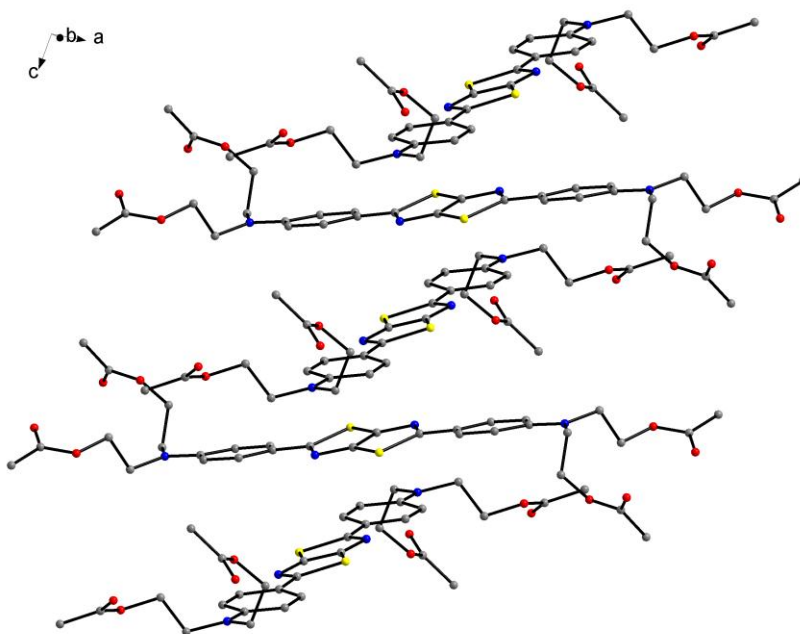

**Fig. S3.** The packing pattern of the unit cell for compound **1**.

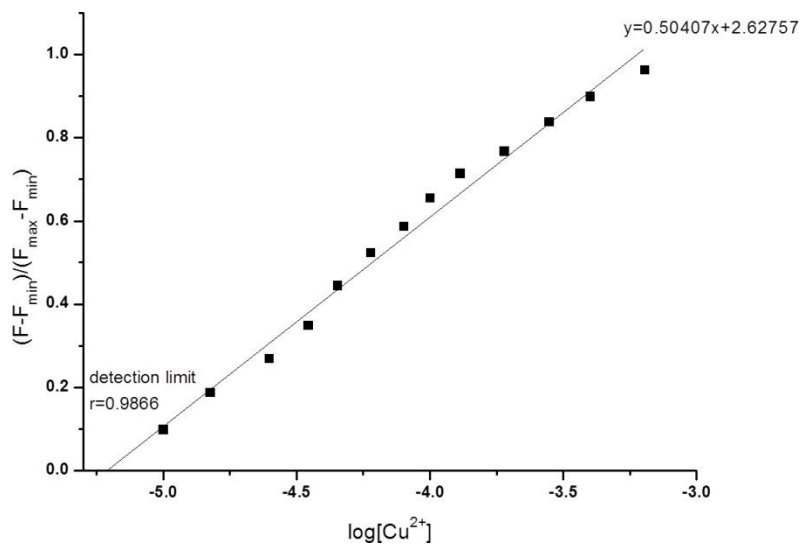

**Fig. S4.** Normalized fluorescence responses of **1** ( $1 \times 10^{-5}$  M) to changing  $\text{Cu}^{2+}$  concentrations in  $\text{CH}_3\text{CN}:\text{H}_2\text{O}$  (95:5, v/v).

**Table S1.** Crystallographic data for **I**.

|                                                | <b>I</b>                                          |
|------------------------------------------------|---------------------------------------------------|
| Empirical formula                              | $C_{32}H_{36}N_4O_8S_2$                           |
| Formula weight                                 | 668.77                                            |
| Temperature                                    | 293 K                                             |
| Wavelength                                     | 0.71073 Å                                         |
| Space group                                    | C2/c                                              |
| a                                              | 42.455(9) Å                                       |
| b                                              | 9.0245(18) Å                                      |
| c                                              | 8.5542(17) Å                                      |
| $\alpha$                                       | 90.00°                                            |
| $\beta$                                        | 97.96(3)°                                         |
| $\gamma$                                       | 90.00°                                            |
| Volume                                         | 3245.8(11) Å <sup>3</sup>                         |
| Z                                              | 4                                                 |
| Calculated density                             | 1.369 Mg/m <sup>3</sup>                           |
| Absorp. coefficient                            | 0.221 mm <sup>-1</sup>                            |
| F(000)                                         | 1408                                              |
| Crystal size                                   | 0.08 x 0.05 x 0.05 mm <sup>3</sup>                |
| Reflections collected                          | 8847                                              |
| Independent reflections                        | 3186 [R(int) = 0.0578]                            |
| Data/restraints/parameters                     | 3186 / 0 / 210                                    |
| Goodness-of-fit <sup>a</sup> on F <sup>2</sup> | 1.004                                             |
| Final R indices [I > 2σ(I)]                    | R <sub>1</sub> = 0.0549, wR <sub>2</sub> = 0.1113 |
| R indices (all data)                           | R <sub>1</sub> = 0.1402, wR <sub>2</sub> = 0.1359 |
| Largest diff. peak and hole                    | 0.200 and -0.186 e.Å <sup>-3</sup>                |
| CCDC number                                    | CCDC 900345                                       |

**Table S2.** The bond lengths and angles for **I**.

---

|              |          |
|--------------|----------|
| S(1)-C(1)    | 1.713(3) |
| S(1)-C(2)    | 1.751(3) |
| N(1)-C(2)    | 1.310(4) |
| N(1)-C(1)#1  | 1.371(4) |
| N(2)-C(6)    | 1.389(4) |
| N(2)-C(13)   | 1.456(4) |
| N(2)-C(9)    | 1.457(4) |
| O(1)-C(15)   | 1.338(4) |
| O(1)-C(14)   | 1.444(4) |
| O(2)-C(15)   | 1.197(4) |
| O(3)-C(11)   | 1.324(5) |
| O(3)-C(10)   | 1.440(4) |
| O(4)-C(11)   | 1.172(4) |
| C(1)-C(1)#1  | 1.371(5) |
| C(1)-N(1)#1  | 1.371(4) |
| C(2)-C(3)    | 1.471(4) |
| C(3)-C(8)    | 1.385(4) |
| C(3)-C(4)    | 1.386(4) |
| C(4)-C(5)    | 1.378(4) |
| C(4)-H(4)    | 0.9300   |
| C(5)-C(6)    | 1.402(4) |
| C(5)-H(5)    | 0.9300   |
| C(6)-C(7)    | 1.396(4) |
| C(7)-C(8)    | 1.371(4) |
| C(7)-H(7)    | 0.9300   |
| C(8)-H(8)    | 0.9300   |
| C(9)-C(10)   | 1.492(5) |
| C(9)-H(9A)   | 0.9700   |
| C(9)-H(9B)   | 0.9700   |
| C(10)-H(10A) | 0.9700   |
| C(10)-H(10B) | 0.9700   |
| C(11)-C(12)  | 1.479(6) |
| C(12)-H(12A) | 0.9600   |
| C(12)-H(12B) | 0.9600   |

|                    |           |
|--------------------|-----------|
| C(12)-H(12C)       | 0.9600    |
| C(13)-C(14)        | 1.507(4)  |
| C(13)-H(13A)       | 0.9700    |
| C(13)-H(13B)       | 0.9700    |
| C(14)-H(14A)       | 0.9700    |
| C(14)-H(14B)       | 0.9700    |
| C(15)-C(16)        | 1.493(5)  |
| C(16)-H(16A)       | 0.9600    |
| C(16)-H(16B)       | 0.9600    |
| C(16)-H(16C)       | 0.9600    |
|                    |           |
| C(1)-S(1)-C(2)     | 88.84(15) |
| C(2)-N(1)-C(1)#1   | 108.0(2)  |
| C(6)-N(2)-C(13)    | 120.7(3)  |
| C(6)-N(2)-C(9)     | 120.7(3)  |
| C(13)-N(2)-C(9)    | 118.4(3)  |
| C(15)-O(1)-C(14)   | 118.0(3)  |
| C(11)-O(3)-C(10)   | 119.3(3)  |
| C(1)#1-C(1)-N(1)#1 | 118.2(3)  |
| C(1)#1-C(1)-S(1)   | 108.9(3)  |
| N(1)#1-C(1)-S(1)   | 132.9(2)  |
| N(1)-C(2)-C(3)     | 123.9(3)  |
| N(1)-C(2)-S(1)     | 116.0(2)  |
| C(3)-C(2)-S(1)     | 120.1(2)  |
| C(8)-C(3)-C(4)     | 117.1(3)  |
| C(8)-C(3)-C(2)     | 121.4(3)  |
| C(4)-C(3)-C(2)     | 121.5(3)  |
| C(5)-C(4)-C(3)     | 121.9(3)  |
| C(5)-C(4)-H(4)     | 119.0     |
| C(3)-C(4)-H(4)     | 119.0     |
| C(4)-C(5)-C(6)     | 121.1(3)  |
| C(4)-C(5)-H(5)     | 119.5     |
| C(6)-C(5)-H(5)     | 119.5     |
| N(2)-C(6)-C(7)     | 122.2(3)  |
| N(2)-C(6)-C(5)     | 121.5(3)  |
| C(7)-C(6)-C(5)     | 116.3(3)  |



|                     |          |
|---------------------|----------|
| C(8)-C(7)-C(6)      | 122.2(3) |
| C(8)-C(7)-H(7)      | 118.9    |
| C(6)-C(7)-H(7)      | 118.9    |
| C(7)-C(8)-C(3)      | 121.3(3) |
| C(7)-C(8)-H(8)      | 119.3    |
| C(3)-C(8)-H(8)      | 119.3    |
| N(2)-C(9)-C(10)     | 112.9(3) |
| N(2)-C(9)-H(9A)     | 109.0    |
| C(10)-C(9)-H(9A)    | 109.0    |
| N(2)-C(9)-H(9B)     | 109.0    |
| C(10)-C(9)-H(9B)    | 109.0    |
| H(9A)-C(9)-H(9B)    | 107.8    |
| O(3)-C(10)-C(9)     | 109.0(3) |
| O(3)-C(10)-H(10A)   | 109.9    |
| C(9)-C(10)-H(10A)   | 109.9    |
| O(3)-C(10)-H(10B)   | 109.9    |
| C(9)-C(10)-H(10B)   | 109.9    |
| H(10A)-C(10)-H(10B) | 108.3    |
| O(4)-C(11)-O(3)     | 121.9(4) |
| O(4)-C(11)-C(12)    | 126.4(5) |
| O(3)-C(11)-C(12)    | 111.7(4) |
| C(11)-C(12)-H(12A)  | 109.5    |
| C(11)-C(12)-H(12B)  | 109.5    |
| H(12A)-C(12)-H(12B) | 109.5    |
| C(11)-C(12)-H(12C)  | 109.5    |
| H(12A)-C(12)-H(12C) | 109.5    |
| H(12B)-C(12)-H(12C) | 109.5    |
| N(2)-C(13)-C(14)    | 114.3(3) |
| N(2)-C(13)-H(13A)   | 108.7    |
| C(14)-C(13)-H(13A)  | 108.7    |
| N(2)-C(13)-H(13B)   | 108.7    |
| C(14)-C(13)-H(13B)  | 108.7    |
| H(13A)-C(13)-H(13B) | 107.6    |
| O(1)-C(14)-C(13)    | 111.8(3) |
| O(1)-C(14)-H(14A)   | 109.3    |
| C(13)-C(14)-H(14A)  | 109.3    |

|                     |          |
|---------------------|----------|
| O(1)-C(14)-H(14B)   | 109.3    |
| C(13)-C(14)-H(14B)  | 109.3    |
| H(14A)-C(14)-H(14B) | 107.9    |
| O(2)-C(15)-O(1)     | 121.8(4) |
| O(2)-C(15)-C(16)    | 126.7(4) |
| O(1)-C(15)-C(16)    | 111.5(4) |
| C(15)-C(16)-H(16A)  | 109.5    |
| C(15)-C(16)-H(16B)  | 109.5    |
| H(16A)-C(16)-H(16B) | 109.5    |
| C(15)-C(16)-H(16C)  | 109.5    |
| H(16A)-C(16)-H(16C) | 109.5    |
| H(16B)-C(16)-H(16C) | 109.5    |

---

Symmetry transformations used to generate equivalent atoms:

#1 -x+2,-y+3,-z+1
